# Supplementary material for: Artificial selection causes significant linkage disequilibrium among multiple unlinked genes in Australian wheat
Source: PubMed Central journal article supplement (PMC6708422; doi:10.1111/eva.12807), 2019-07-18

Figure S1. Selection signatures detected in each of the five Australian states using nSL, iHS, XPCLR and Fst. Horizontal lines represent the significant thresholds.

## NSW

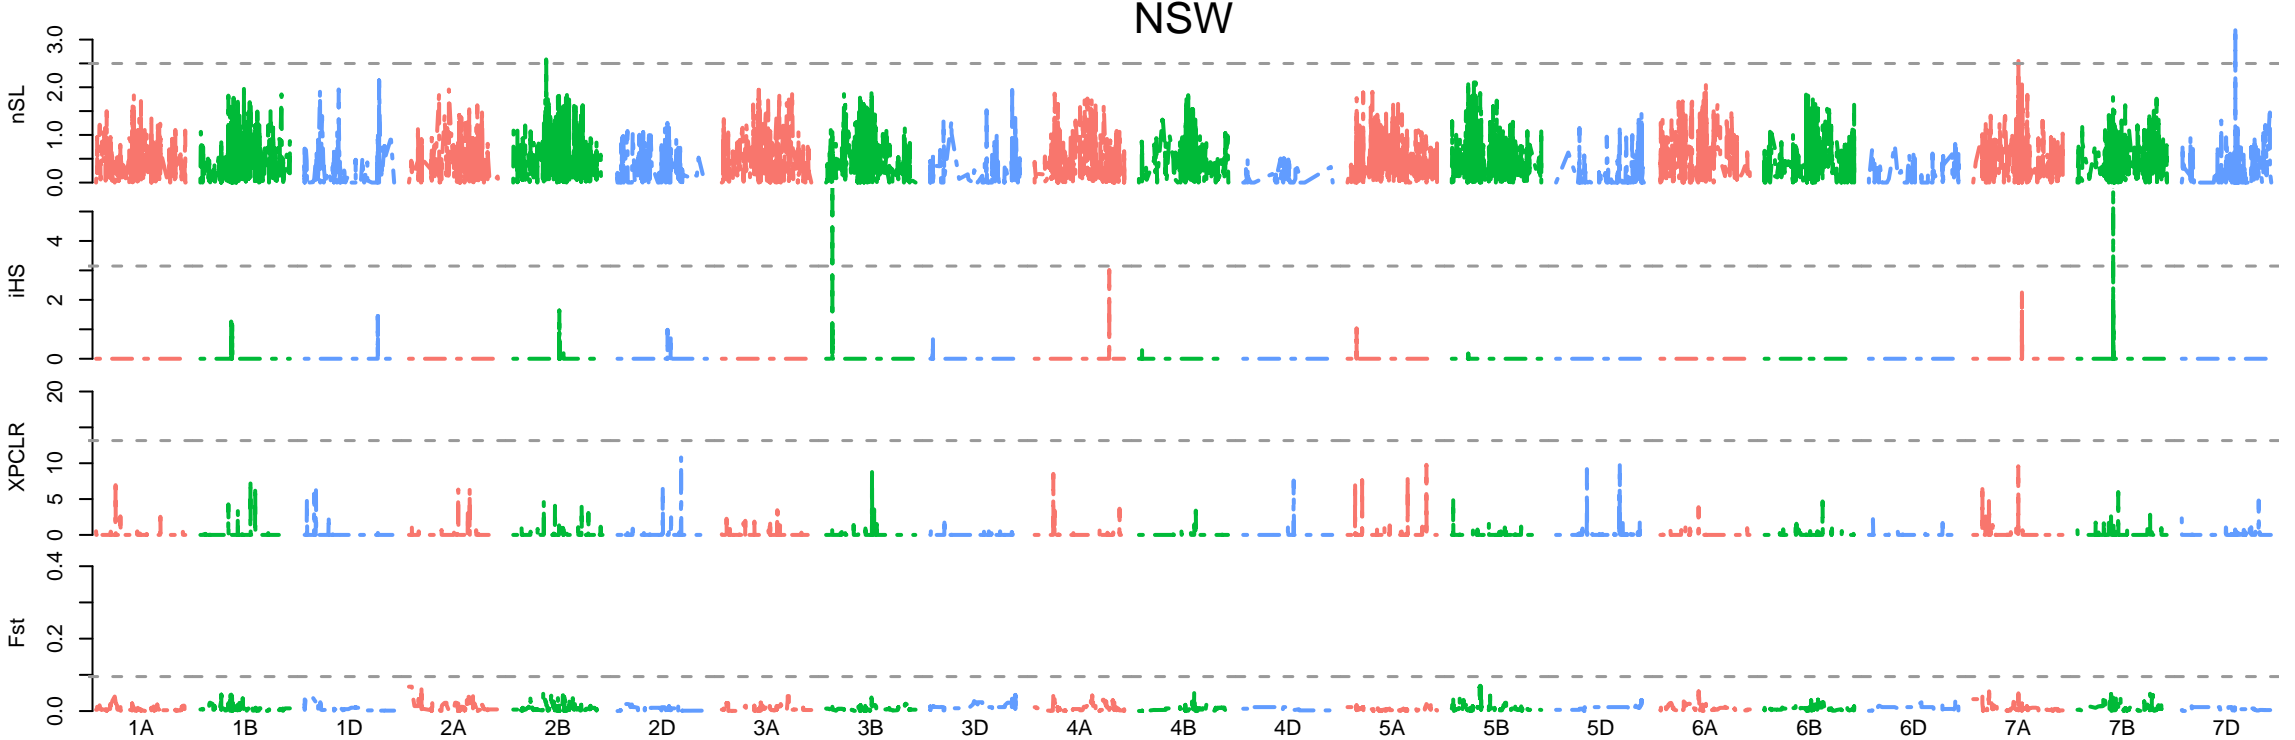

## QLD

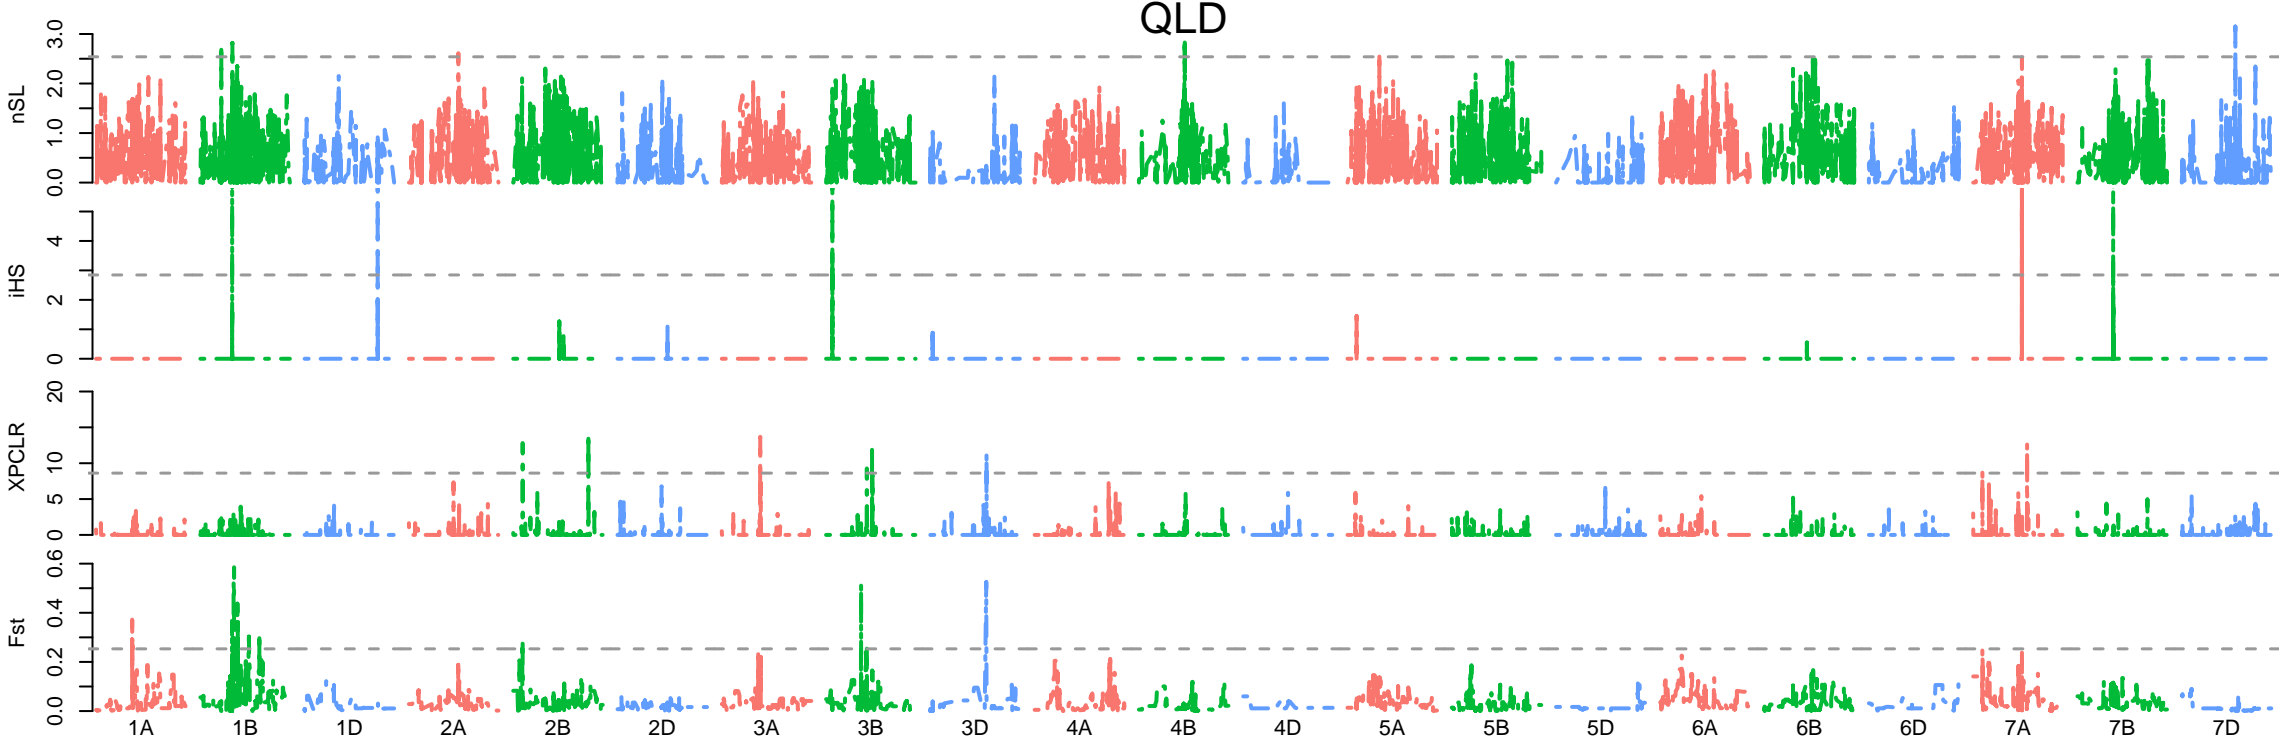

SA

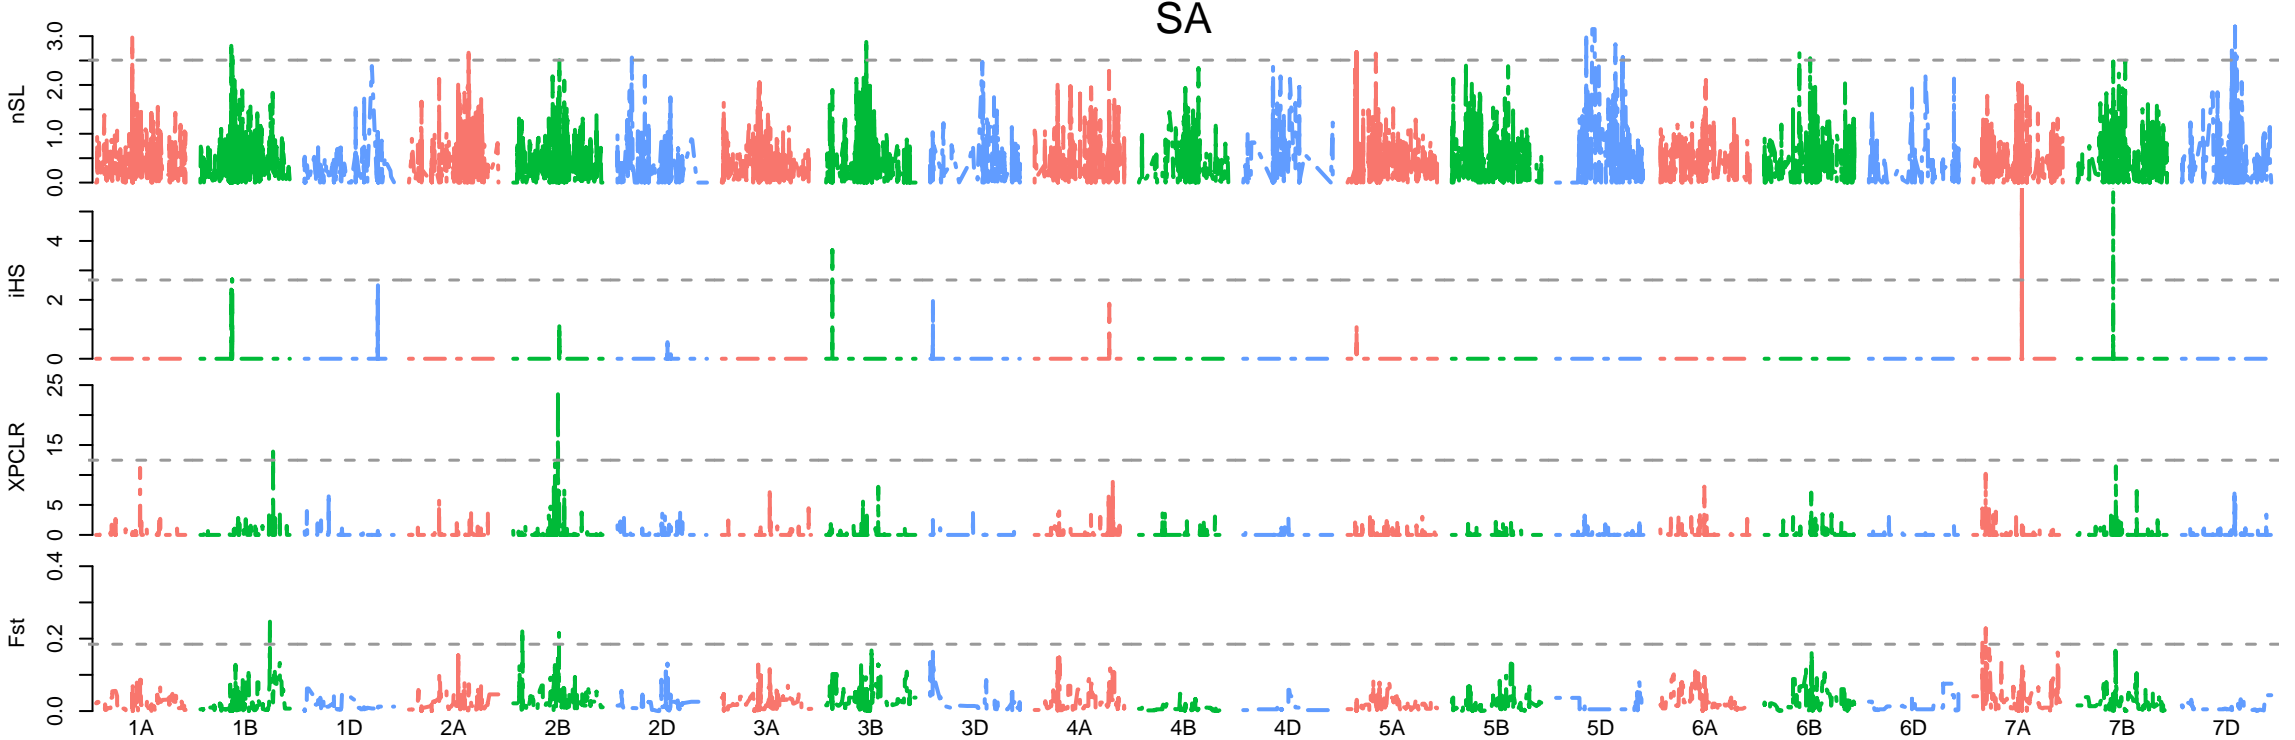

## VIC

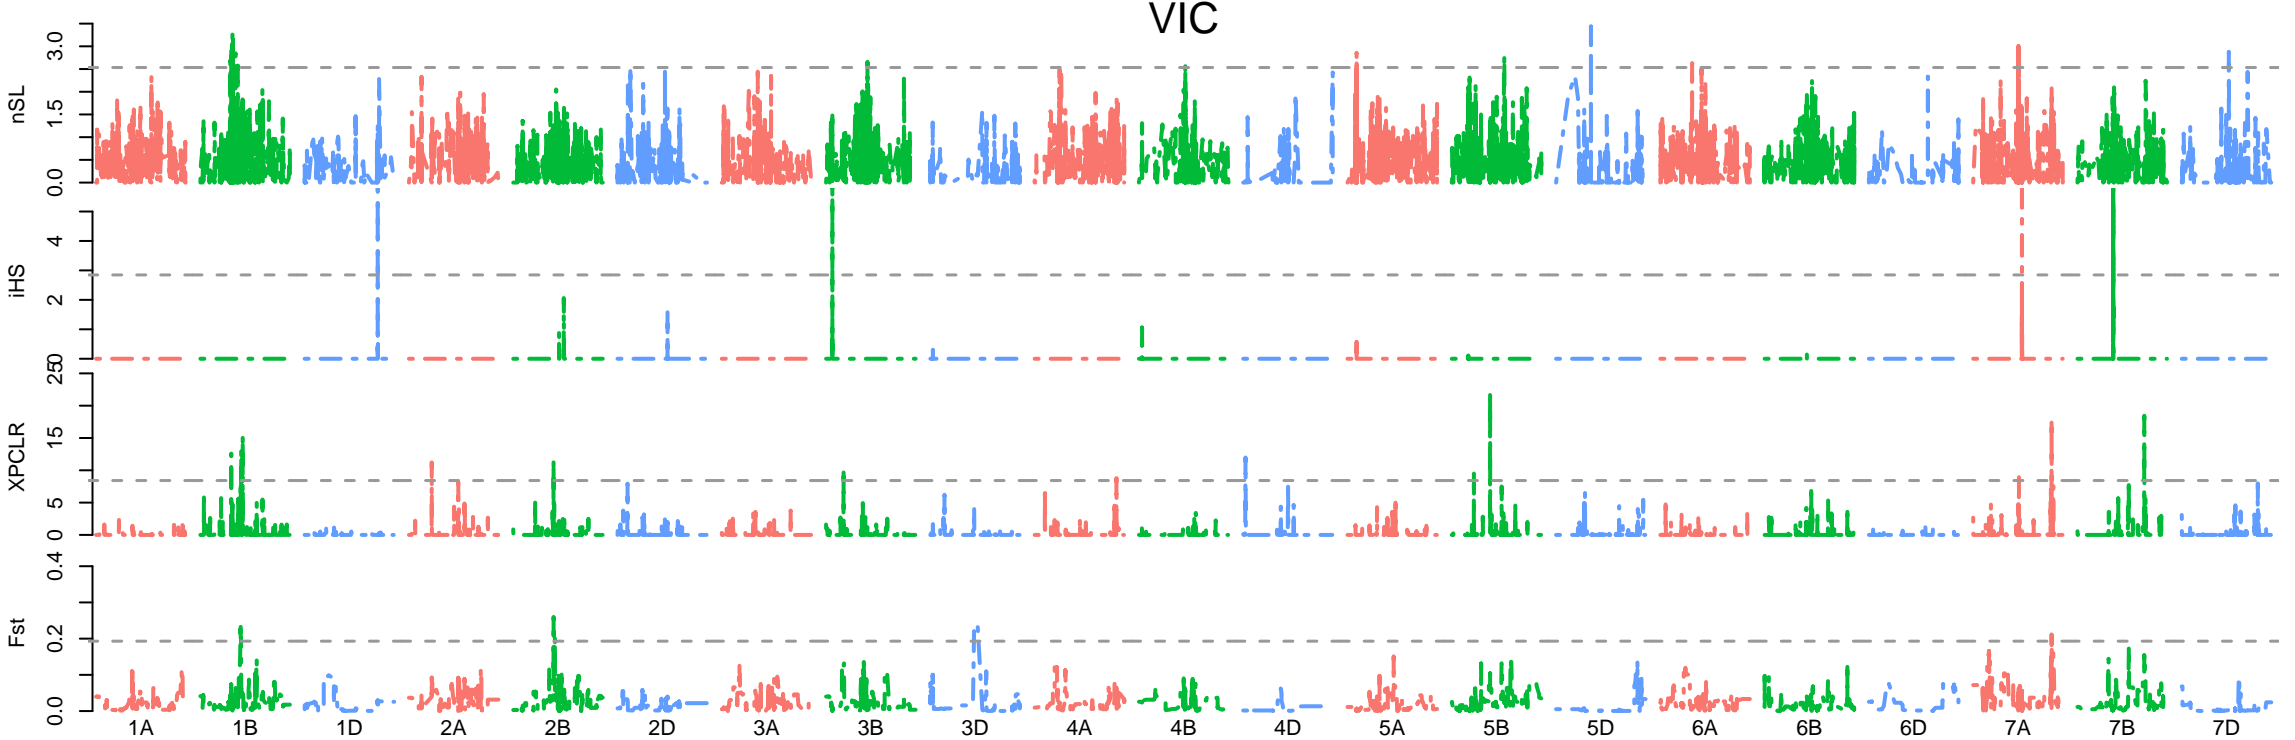

## WA

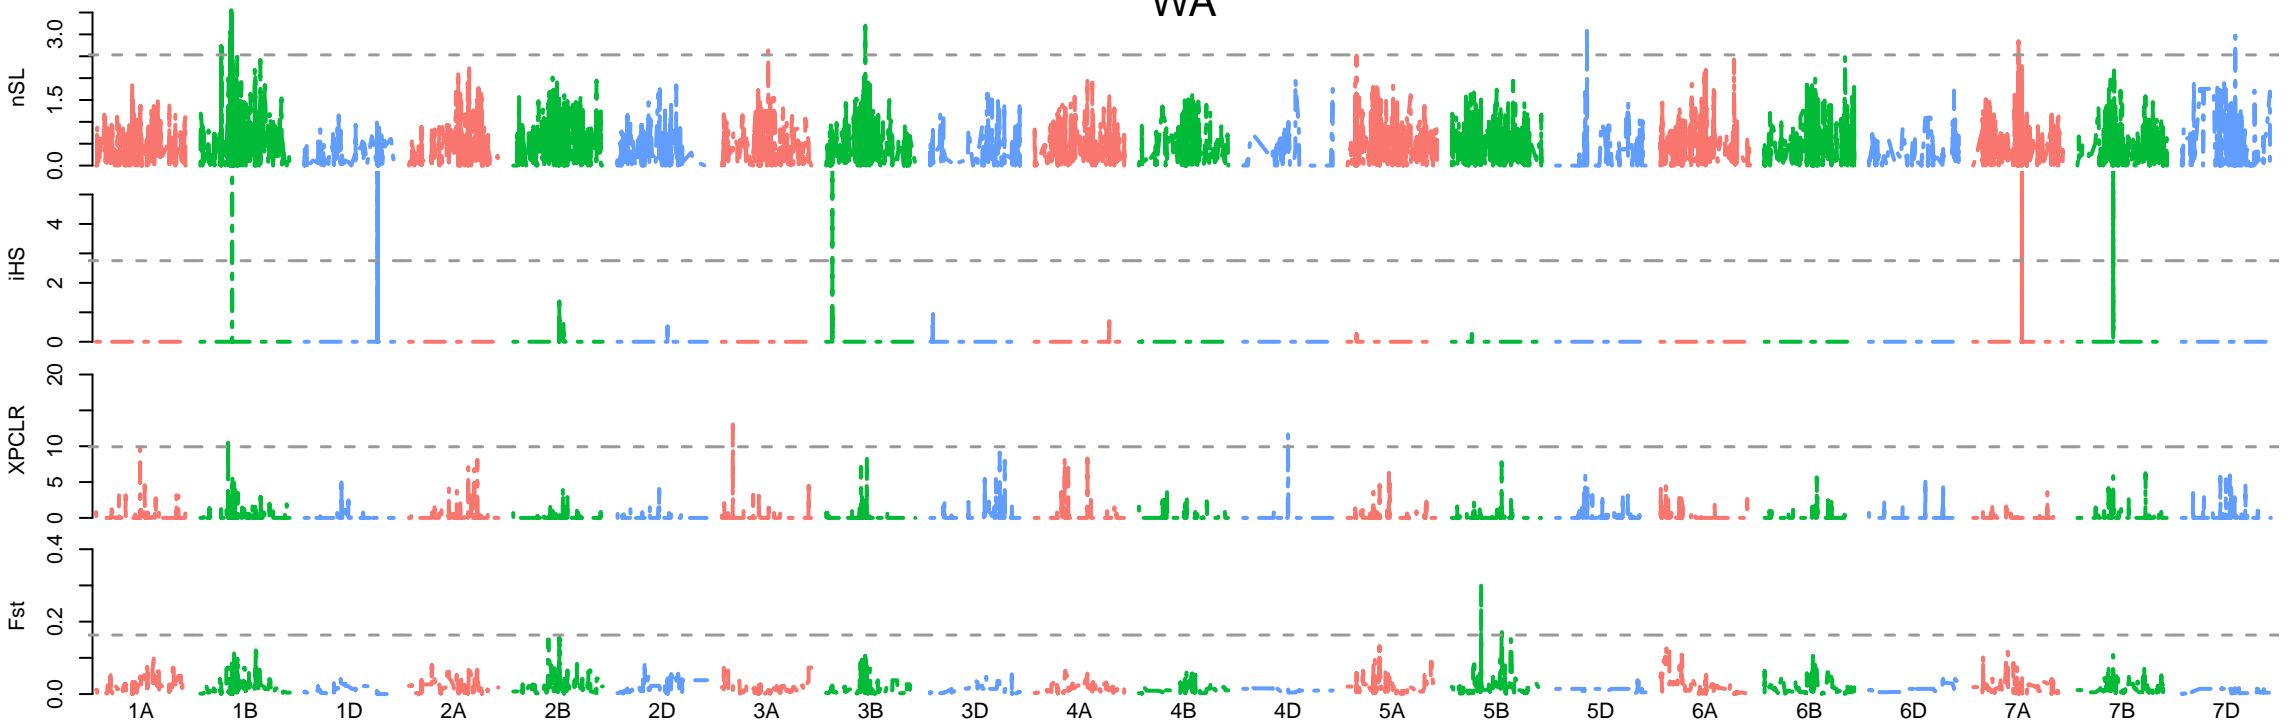

Supplement: EVA-12-1610-s001.pdf [file EVA-12-1610-s001.pdf]
